# Supplementary material
Source: PubMed Central journal article supplement (PMC6253380)
Supplement: rspb20181251supp1.pdf [file rspb20181251supp1.pdf]

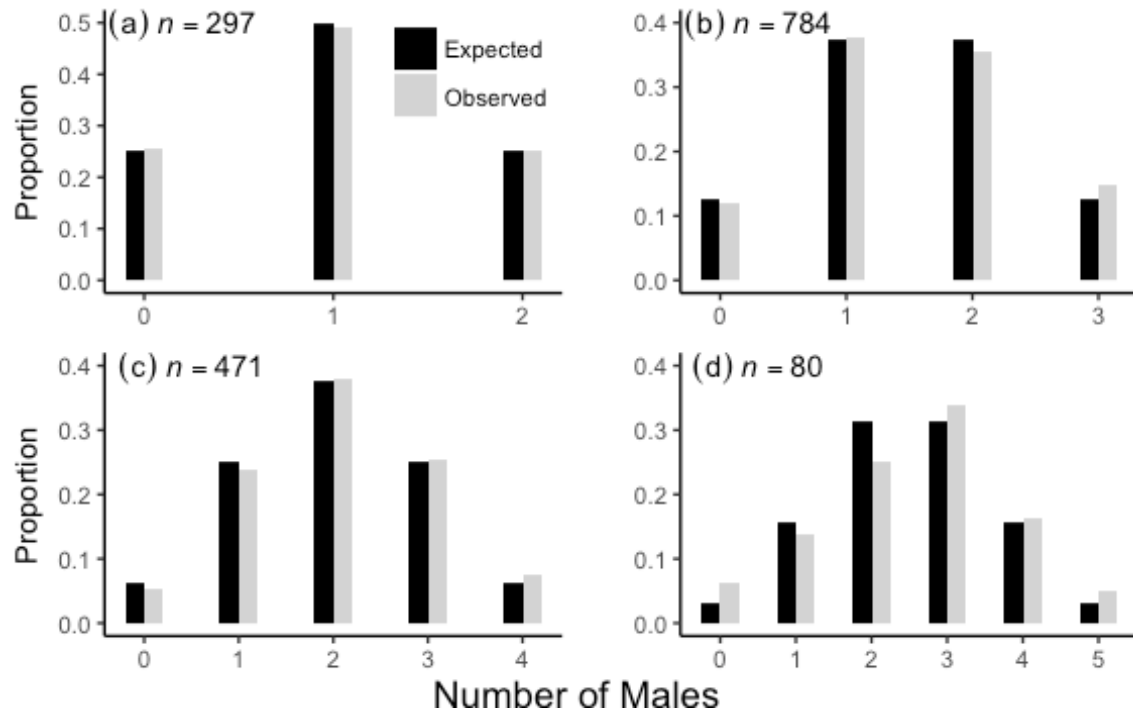

**Supplementary Figure 1.** Expected and observed frequency of male offspring per litter in 1728 North American red squirrel litters of (A) two, (B) three, (C) four, and (D) five juveniles observed over 20 years. Sample size (n) in each panel indicates the number of litters.
